# Supplementary material for: Highly Diverse, Poorly Studied and Uniquely Threatened by Climate Change: An Assessment of Marine Biodiversity on South Georgia's Continental Shelf
Source: PLoS One. 2011 May 25;6(5):e19795. doi: 10.1371/journal.pone.0019795 (PMC3102052; doi:10.1371/journal.pone.0019795)
Supplement: Appendix S1 — Census list of species present at South Georgia. Those with an * suffix were noted as present, but assigned no geographical location. (XLS) [file pone.0019795.s001.xls]

## Sheet: Final Species List
Acanthocephala	Cirratulus jucundus	Milnesium tardigradum	Syllis prolixa	Buffonellodes antarctica	Fenestrulina crystallina	Osthimosia notialis	Chaetognatha	Antarctomysis ohlini	Oradarea bidentata	Lepidonotothen larseni	Molgula pedunculata	Corallimorphus profundus	Parastenella spinosa	Halecium arboreum	Ammothea minor	Eudorella gracilior	Prostebbingia gracilis	Pentapycnon bouvieri	Lepidepecreum urometacarinatum	Eremicaster crassus	Perknaster sladeni	Laetmogone interjacens	Ennucula georgiana	Slosarczykovia circumantarctica	Nacella polaris*	Nematodes	Dorylaimopsis punctata	Paracanthonchus caecus	Xennella filicaudata	Trigonostomum setigerum	Mycale tridens
	Cirratulus patagonicus	Neanthes kerguelensis	Syllis sclerolaema	Cabarea darwinii	Fenestrulina exigua	Osthimosia rudicula		Antatelson cultricauda	Oradarea tricarinata	Lepidonotothen nudifrons	Molgula pulchra	Dendrobathypathes grandis	Primnoella scotiae	Halecium delicatulum	Ammothea sexarticulata	Eudorella sordida	Prostebbingia longicornis	Pseudopallene centrotus	Leptognathia australis	Eremicaster vicinus	Porania antarctica	Laetmogone wyvillethomsoni	Gaimardia trapesina	Thaumeledone gunteri	Newnesia antarctica		Draconema cephalatum	Paracanthonchus elongatus		Uncinorhynchus flavidus	Myxilla asigmata
Andracantha baylisi	Eteone sculpta	Neoleprea streptochaeta	Terebella ehlersi	Camptoplites asymmetricus	Fenestrulina fritilla	Osthimosia bicornis	Eukrohnia hamata	Antatelson walkeri	Oradarea tridentata	Lepidonotothen squamifrons	Molgula pyriformis	Epiactis georgiana	Primnoisis ambigua	Halecium pallens	Ammothea sextarticulata	Euphausia frigida	Prothaumatelson nasutum	Pycnogonum diceros	Leptognathia breviremis	Gaussaster antarcticus	Porania magellanica	Mesothuria edwardensis	Genaxinus debilis		Nothoadmete antarctica	Adoncholaimus austrogeorgiae	Elzalia tenuis	Paracanthonchus kreisi	Nemerteans		Myxilla australis
Aspersentis austrinus	Euchone heteroseta	Neosabellides elongatus	Terebellides longicaudatus	Camptoplites bicornis	Fenestrulina jocunda	Osthimosia curtioscula	Pseudosagitta gazellae	Apherusa georgiana	Orchestia scutigerula	Lycodapus antarcticus	Molguloides cyclocarpa	Flabellum areum	Primnoisis mimas	Halecium tenellum	Ammothea striata	Euphausia superba	Pseudamphilochus shoemakeri	Pycnogonum gaini	Leptognathia gallardoi	Gorgonocephalus chilensis	Pseudarchaster discus	Molpadia abyssicola	Hiatella solida	Gastropods	Nothoadmete consobrina	Adoncholaimus thalassophygas	Enchelidium brevicaudatum	Paracanthonchus paralongus		Porifera	Myxilla basimucronata
Aspersentis megarhynchus	Euchone pallida	Neosamytha gracilis	Terebellides stroemii	Camptoplites giganteus	Fenestrulina parvipora	Osthimosia milleporoides	Pseudosagitta maxima	Apohyale hirtipalma	Orchomenella cavimanus	Macrourus carinatus	Paramolgula gregaria	Flabellum flexuosum	Rosgorgia inexspectata	Hebella striata	Ammothea stylirostris	Euphausia triacantha	Pseudericthonius gaussi	Pycnogonum rhynoceros	Leptostylis antipus	Granaster nutrix	Psilaster charcoti	Molpadia musculus	Kidderia bicolor	Amauropsis anderssoni	Onoba delecta	Aegialoalaimus conicaudatus	Enchelidium tenuicolle	Paracanthonchus paramacrodon	Amphiporus lecointei		Myxilla mollis
Corynosoma arctocephali	Eucranta mollis	Nephtys ferruginea	Tharyx epitoca	Camptoplites latus	Fenestrulina proxima	Paracellaria calveti	Sagitta gazellae	Apseudes spectabilis	Orchomenella zschaui	Macrourus whitsoni	Pareugyrioides arnbackae	Flabellum gardineri	Thouarella chilensis	Hydractinia parvispina	Ammothea tetrapora	Eurymera monticulosa	Pseudischyrocerus distichon	Tanystylum neorhetum	Leucon sagitta	Henricia pagenstecheri	Pteraster affinis	Molpadiodemas morbillus	Lasaea adansoni	Amauropsis aureolutea	Onoba anderssoni*	Aegialoalaimus tenuicaudatus	Enoplolaimus acanthospiculum	Paracanthonchus spectabilis	Amphiporus moseleyi	Demosponges	Myxodoryx hanitschi
Corynosoma bullosum	Eulalia magalhaensis	Nicomache lumbricalis	Thelepus cincinnatus	Camptoplites retiformis	Fenestrulina fritilla	Paracellaria cellarinoides	Solidosagitta planctonis	Aristias antarcticus	Orchomenella acanthura	Mancopsetta maculata	Pareugyrioides galatheae	Gardineria antarctica	Thouarella crenelata	Hydrodendron arboreum	Austrodecus glabrum	Eurythenes obesus	Euchirella rostrata	Tanystylum pfefferi	Leucothoe spinicarpa	Homalophiura inornata	Remaster gourdoni	Molpadiodemas villosus	Laternula elliptica	Amauropsis georgianus	Onoba gelida	Anoplostoma tenuicaudum	Enoplolaimus filiformis	Paralinhomoeus ampullocaudatus	Amphiporus spinosus	Amphilectus fucorum	Oscarella lobularis
Corynosoma evae	Eulalia subulifera	Nicon ehlersi	Thelepus setosus	Camptoplites tricornis	Fenestrulina rugula*	Paracellaria wandeli		Atyloella magellanica	Orchomenella cavimanus	Melanostigma gelatinosum	Polysyncraton chondrilla	Glyphoperidium bursa	Thouarella diadema	Lafoea dumosa	Austrodecus glaciale	Eusiroides crassi	Euchirella rostromagna		Liljeborgia georgiana	Hyphalaster inermis	Solaster regularis	Neopsolidium convergens	Limatula hodgsoni	Amauropsis powelli	Onoba georgiana	Anticoma acuminata	Enoplolaimus niger	Paralinhomoeus dolichurus	Cerebratulus larseni	Aplysilla sulfurea	Phorbas areolatus
Corynosoma hamanni	Eunice frauenfeldi	Notalia picta	Timarete antarcticus	Carbasea curva	Filaguria spatulata	Pemmatoporella marginata	Chelicerata	Austropleustes simplex	Orchomenella pinguides	Micromesistius australis	Polysyncraton trivolutum	Hormathia lacunifera	Thouarella undulata	Lafoea gracillima	Austrodecus kelpi	Eusiroides georgiana	Gaetanus affinis	Ostracods	Liljeborgia georgiensis	Labidiaster annulatus	Styracaster schmitti	Oneirophanta mutabilis	Limatula pygmaea	Anatoma euglypta	Onoba filostria*	Anticoma allgeni	Enoplolaimus vulgaris	Paralinhomoeus lepturus	Lineus corrugatus	Artemisina apollinis	Phorbas glaberrimus
Corynosoma shackletoni	Eunice pennata	Nothria anoculata	Tomopteris carpenteri	Carbasea ovoidea	Galeopsis bullatus	Pyriporoides uniserialis		Bathypanoploea schellenbergi	Orchomenella zschaui	Muraenolepis marmoratus	Polyzoa opuntia	Hormosoma scotti	Fannyella kuekenthali	Lafoeina longitheca	Austropallene brachyura	Eusiroides monoculoides	Gaetanus pungens	Cythereis frequens	Liljeborgia kerguelenensis	Labidiaster radiosus	Theodoria relegata	Pseudocnus dubiosus	Limopsis enderbyensis	Austrodoris georgiensis	Onoba turqueti*	Anticoma filicauda	Enoplus michaelseni	Paramesacanthion oxycephalum	Nipponnemertes pulchra	Asbestopluma calyx	Plakina trilopha
Echinorhynchus petrotschenkoi	Eunoe anderssoni	Notomastus latericeus	Tomopteris planktonis	Carbasea curva	Harpecia spinosissima	Ralepria conforma	Mites	Boreomysis atlantica	Orchomenyx macronyx	Muraenolepis microps	Protoholozoa lilium	Javania antarctica	Funiculina quadrangularis	Lepidopora acrolophos	Austropallene bucera	Eusirus antarcticus	Gaidius tenuispinus	Cythereis longiductus	Liljeborgia longicornis	Lonchotaster tartareus	Tremaster mirabilis	Pseudostichopus peripatus	Limopsis lilliei	Austrodoris kerguelenensis	Onoba schraderi	Anticoma tenuis	Enoplus micrognathus	P. paracanthospiculum	Oerstedia gulliveri	Calyx arcuarius	Plocamia gaussiana
Heterosentis heteracanthus	Euphrosine arctia	Onuphis eremita	Tomopteris septentrionalis	Carbasea ovoidea	Himantozoum antarcticum	Reteporella antarctica	Agaue verrucosa	Boreomysis brucei	Orchomenyx schellenbergi	Neopagetopsis ionah	Protoholozoa pendunculata	Parantheopsis georgiana	Gersemia antarctica	Myriothela austro-georgiae	Austropallene cornigera	Fuegiphoxus fuegiensis	Haloptilus oxycephalus	Cythereis megalodiscus	Liljeborgia quadridentata	Lysasterias perrieri	Zoroaster fulgens	Psolicrux coatsi	Limopsis marionensis	Austrodoris kerguelenensis	Onoba steineni	Anticoma trichura	Euchromadora linstowi	Paranticoma odhneri	Parapolia grytvikenensis	Calyx kerguelensis	Polymastia invaginata
Metacanthocephalus dalmori	Euphrosine monroi	Ophelina breviata	Travisia antarctica	Cellaria diversa	Hippadanella inerma*	Reteporella erugata	Agauopsis inflatus	Boreomysis inermis	Pagetina genarum	Notolepis coatsi	Pyura chilensis	Schizopathes crassa	Mirostenella articulata	Obelia austro-georgiae	Austropallene cristata	Fuegiphoxus inutilus	Heterorhabdus austrinus	Cythereis robusta	Megamphopus dimorpha	Macroptychaster accrescens		Psolidium coatsi	Limopsis scotiana	Bathyberthella antarctica	Paradmete curta	Antopus serialis	Euchromadora loricata	Pareuchromadora fragilis	Parborlasia corrugatus	Cercidochela lankesteri	Pseudosuberites hyalinus
Metacanthocephalus johnstoni	Euphrosinella cirratoformis	Ophryotrocha notialis	Travisia olens	Cellaria malvinensis	Hippomonavella pellucida	Reteporella frigida	Alaskozetes antarcticus	Boreomysis rostrata	Paraceradocus miersi	Notothenia coriiceps	Pyura discoveryi	Sicyonis erythrocephala	Mopsea elongata	Oswaldella elongata	Austroraptus juvenilis	Gammaropsis blaisus	Heterorhabdus farrani	Cythereis spinifera	Melphidippa antarctica	Neosmilaster georgiacnus	Crinoids	Psolidium gaini	Lissarca miliaris	Bathydoris clavigera	Paradmete fragillima	Araeolaimus cobbi	Euchromadora vulgaris	Pelagonema obtusicauda	Parborlasia fueguina	Cinachyra antarctica	Pseudosuberites sulcatus
	Eusyllis kerguelensis	Oriopsis alata	Travisiopsis levinseni	Cellaria malvinensis	Hippomonavella ramosae	Reteporella gelida	Antarcticola georgiae	Boreomysis sibogae	Paraceradocus ramulus	Notothenia neglecta	Pyura georgiana	Stomphia selaginella	Onogorgia nodosa	Oswaldella grandis	Austroraptus praecox	Gammaropsis georgiana	Heterorhabdus pustulifer	Doloria levis	Methalimedon nordenskjoldi	Notasterias bongraini	Eumorphometra aurora	Psolidium incubans	Lissarca notorcadensis	Bela anderssoni	Pellilitorina pellita	Araeolaimus dubiosus	Eumorpholaimus macrocirculus	Pelagonema tenue	Tetrastemma esbenseni	Cinachyra barbata	Pyloderma latrunculioides
Annelida	Exogone heterosetosa	Oriopsis limbata	Trichobranchus glacialis	Cellarinella anomala	Hippomonavella pellucida	Reteporella protecta	Bradyagaue drygalskii	Bovallia gigantea	Paradexamine fissicauda	Notothenia rossii	Pyura legumen	Aglaoprimnoa stefanii	Parastenella spinosa	Pandea rubra	Biammothea brevipalpa	Gammaropsis longicornis	Litoscalpellum convexum	Empoulsenia quinquesetae		Notasterias stolophora	Isometra flavescens	Psolus antarcticus	Lyonsia arcaeformis	Bela fulvicans	Pellilitorina setosa	Araeolaimus elegans	Eurystomatina filicolle	Phanoderma campbelli	Tetrastemma georgianum	Cladocroce gaussiana	Spongia magellanica
	Exogone minuscula	Orseis fimbriata	Trypanosyllis gigantea	Cellarinella dubia	Hippomonavella ramosae	Reteporella erugata	Bryobia praetiosa	Brucerolis bromleyana	Paradexamine pacifica	Parachaenichthys georgianus	Styela glans	Alcyonium antarcticum	Primnoella scotiae	Schizotricha anderssoni	Callipallene margarita	Gammaropsis purpurescens	Litoscalpellum discoveryi	Isocypridina quatuorsetae	Echinodermata	Notioceramus anomalus	Isometra graminea	Psolus belgicae	Macoma georgiana	Belaturricula turrita	Philine gibba	Araeolaimus longicauda	Eurystomatina tenuicaudatum	Phanoderma cocksi	Tetrastemma gulliveri	Clathria amabilis	Stylocordyla borealis
Clitellates	Exogone verugera	Paradiopatra abranchiata	Typhloscolex muelleri	Cellarinella edita	Hippothoa flagellum	Reteporella protecta	Cyrthydrolaelaps watsoni	Byblis securiger	Paralicella similis	Paraliparis gracilis	Styela materna	Alcyonium grandis	Primnoisis ambigua	Schizotricha jaederholmi	Colossendeis australis	Gammaropsis serricra	Lucicutia bradyana	Macromckenziea glacierae		Odinella nutrix	Isometra vivipara	Psolus charcoti	Mysella charcoti	Cerithiopsilla bisculpta	Philine gibba	Araeolaimus obtusicaudatus	Graphonema amokurae	Phanoderma paracampbelli	Tetrastemma longistriatum	Clathria antarctica	Suberites microstomus
Grania lasserrei	Flabelligera affinis	Paralaeospira levinseni	Vanadis antarctica	Cellarinella foveolata	Inversiula nutrix	Rhamphosmittina bassleri	Edwardzetes elongatus	Byblis subantarctica	Paralomis anamerae		Styela nordenskjoldi	Alcyonium paucilobulatum	Primnoisis mimas		Colossendeis drakei	Gammaropsis sublitoralis	Lucicutia curta	Macroscapha opaca	Asteroids & Ophiuroids	Odontaster penicillatus	Phrixometra longipinna	Psolus dubiosus	Mysella miniuscula	Chlanidota chordata	Photinula steineni	Araeolaimus paracylindricauda	Halalaimus filicaudatus	Pontonema jollaense	Tetrastemma maivikenensis	Clathria flabellata	Tedania charcoti
Grania monochaeta	Flabelligera induta	Paramphinome australis	Vermiliopsis glacialis	Cellarinella latilaminata	Isoschizoporella secunda	Rhynchozoon fistulosum	Globoppia intermedia longiseta	Campylaspis maculata	Tryphosella triangularis	Ascidians	Styela squamosa	Alcyonium sollasi	Rosgorgia inexspectata	Scyphozoa	Colossendeis frigida	Gammaropsis triodon	Lucicutia macrocera	Philomedes rotunda	Acodontaster capitatus	Odontaster validus	Phrixometra rayneri	Psolus figulus	Neolepton georgianum	Chlanidota densesculpta	Pleurotomella bathybia	Araeolaimus paradubiosus	Halalaimus gracilis	Pseudocella trichodes	Tetrastemma weddelli	Clathria georgiaensis	Tedania massa
Grania stephensoniana	Flabelligera mundata	Paraninoe antarctica	Vermiliopsis notialis	Cellarinella margueritae	Isoschizoporella similis	Smittina alticollarita	Halacarellus novellus	Caprellinoides mayeri	Typhlotanais greenwichensis	Alloeocarpa incrustans	Styela wandeli	Alcyonium southgeorgiensis	Thouarella chilensis	Atolla chuni	Colossendeis glacialis	Gastrosaccus sanctus	Lucicutia ovalis	Quatuorsetae quaturoseta	Acodontaster conspicuous	Ophiacantha antarctica	Promachocrinus kerguelensis	Psolus koehleri	Neolepton holmbergi	Chlanidota densesculpta	Probuccinum angulatum	Araeolaimus tenuicaudatus	Halalaimus longicollis	Sabatieria australis		Clathria membranacea	Tentorium papillatum
Notobdella nototheniae	Flabelligera pennigera	Paraonis gracilis		Cellarinella njegovane	Isosecuriflustra tenuis	Smittina anecdota	Halacarellus porellus	Cardenio paurodactylus	Ultimachelium schellenbergi	Aplidiopsis georgianum	Sycozoa georgiana	Amphilaphis grandflora	Thouarella crenelata	Desmonema glaciale*	Colossendeis megalonyx	Gitanopsis squamosa	Lucicutia wolfendeni	Scleroconcha appelloefi	Acodontaster conspicuus	Ophiacantha frigida	Solanometra antarctica	Psolus psolus	Neolepton powelli	Chlanidota palliata	Proneptunea fenestrata*	Atrochromadora microlaima	Halalaimus southerni	Sabatieria celtica	Platyhelminthes	Clathria nidificata	Tetilla leptoderma
Stibarobdella tasmanica	Genetyllis polyphylla	Pelagobia longicirrata	Brachiopoda	Cellarinella nutti	Isosecuriflustra thysanica	Smittina antarctica	Halozetes belgicae belgicae	Cephalophoxoides kergueleni	Uristes georgianus	Aplidium bilinguae	Sycozoa sigillinoides	Armadillogorgia cyathella	Thouarella diadema		Colossendeis pseudochelata	Paralomis formosa	Metridia curticauda	Spinacopia menziesi	Acodontaster elongatus	Ophiacantha pentactis	Thaumatocrinus renovatus	Psolus punctatus	Philobrya atlantica	Chlanidota paucispiralis	Prosipho chordatus	Axonolaimus austrogeorgiae	Halichoanolaimus filicauda	Sabatieria curvispiculum		Clathria terraenovae	Thieleia rubiginosa
	Glycera capitata	Pherusa swakopianus		Cellarinella rogickae	Klugeflustra antarctica*	Smittina diffidentia	Halozetes littoralis	Cheirimedon femoratus	Uristes gigas	Aplidium falklandicum	Synoicum adareanum	Australisis sarmentosa	Thouarella undulata	Crustaceans	Colossendeis robusta	Paralomis spinosissima	Metridia ferrarii		Acodontaster hodgsoni	Ophiacantha vivipara		Psolus squamatus	Philobrya quadrata	Chlanidota signeyana	Prosipho contrarius	Axonolaimus spinosus	Halichoanolaimus ovalis	Sabatieria dorylaimopsoides	Trematoda	Clathria toxipraedita	Rossella antarctica
Polychaetes	Haploscoloplos kerguelensis	Phyllodoce patagonica	Liothyrella uva	Cellarinella rossi	Klugeflustra vanhoffeni	Smittina directa	Halozetes marinus	Chorismus antarcticus	Vaunthompsonia inermis	Aplidium fuegiense	Synoicum georgianum	Bayergorgia vermidoma			Colossendeis scotti	Paralysianopsis odhneri	Metridia gerlachei	Malacostraca	Amphiophiura antarctica	Ophioceres incipiens	Echinoids	Psychropotes longicauda	Philobrya sublaevis	Clione limacina	Prosipho hunteri	Axonolaimus tenuicaudatus	Halichoanolaimus striatilaimus	Sabatieria heterospiculum	Discoverytrema markowskii	Craniella coactifera	Rossella nuda
Aglaophamus macroura	Harmothoe anderssoni	Pionosyllis anops	Manithyris rossi	Cellarinella watersi	Klugerella antarctica	Smittina glebula	Heterogamasus calcarellus	Chosroes decoratus	Vaunthompsonia meridionalis	Aplidium imbutum	Synoicum giardi	Briareopsis aegeon	Hydrozoans	Maxillopods	Colossendeis tenuipedis	Paramoera brachyura	Metridia lucens	Abyssorchomene rossi	Amphiophiura rowetti	Ophiocten amitinum	Abatus agassizii	Scotoplanes globosa	Philobrya wandelensis	Cuthona georgiana	Prosipho pellitus	Bathylaimus australis	Halicylindrolaimus conicaudatus	Sabatieria longicaudata	Elytrophalloides oatesi	Craniella leptoderma	Rossella racovitzae
Aglaophamus ornatus	Harmothoe brevipalpa	Pionosyllis comosa	Neocrania lecointei	Cellarinelloides crassus	Klugerella olasoi	Smittina incernicula	Hyadesia halophila	Chosroes incisus	Ventojassa georgiana	Aplidium meridianum	Synoicum ramulosum	Callozostron diplodiadema	Aegina citrea	Aetideus australis	Decolopoda australis	Paramoera edouardi	Metridia ornata	Acanthonotozomoides oatesi	Amphioplus affinis	Ophiocten hastatum	Abatus cavernosus	Staurocucumis abyssorum	Poromya adelaidis	Cuthona schraderi	Prosipho perversus	Calyptronema maxweberi	Leptosomatum bacillatum	Sabatieria mortenseni	Genolinea bowersi	Dasychalina validissima
Aglaophamus posterobranchus	Harmothoe crosetensis	Pionosyllis epipharynx		Celleporella alia	Lacerna eatoni	Smittina pileata	Hyadesia maxima	Colomastix fissilingua	Vibilia antarctica	Aplidium paessleri	Tylobranchion antarcticum	Callozostron mirabile	Amphogona apicata	Arcoscalpellum multicostatum	Dromedopycnon acanthus	Paramoera fissicauda	Metridia princeps	Aeginoides gaussi	Amphioplus peregrinator	Ophiocten ludwigi	Amphipneustes koehleri	Staurocucumis liouvillei	Propeleda longicaudata	Cylichna georgiana	Puncturella spirigera	Camacolaimus austrogeorgiae	Leptosomatum elongatum	Sabatieria ornata	Gonocerca phycidis	Dendrilla membranosa	Calcarea
Aglaophamus trissophyllus	Harmothoe kergulensis	Pionosyllis maxima	Bryozoa	Celleporella antarctica	Lacerna hosteensis	Smittina pocilla	Hyadesia subantarctica	Coxophoxus coxalis	Waldeckia zschaui	Aplidium radiatum	Tylobranchion speciosum	Schizotricha southgeorgiae	Botrynema brucei	Ascothorax bulbosus	Endeis australis	Paramoera gregaria	Metridia pseudoasymmetrica	Alexandrella mandibulata	Amphiura alternans	Ophiogona doderleini	Aporocidaris antarctica	Taeniogyrus contortus	Pseudokellya cardiformis	Diaphana inflata	Retusa cumberlandiana	Camacolaimus paratardus	Leptosomatum gracile	Sabatieria praedatrix	Lecithaster macrocotyle	Eurypon miniaceum	Grantia hirsuta
Aglaophamus virginis	Harmothoe magellanica	Pionosyllis nutrix		Celleporella bougainvillei	Lacerna watersi	Smittina rogickae	Hydrogamasellus antarcticus	Cyclaspis quadrituberculata	Zygomaera pfefferi	Aplidium stanleyi	Elasmobranchs	Sertularella antarctica	Crossota brunnea	Bathycalanus princeps	Nymphon adareanum	Paramoera husvikensis	Microcalanus pygmaeus	Alexandrella martae	Amphiura angularis	Ophiolebella biscutifera	Aporocidaris milleri	Trochodota purpurea	Pseudokellya georgiana	Diaphana paessleri	Sinuber sculptum	Camacolaimus tardus	Longicyatholaimus longicaudatus	Sabatieria tenuicaudata	Lepidapedon garrardi	Fibulia meandrina	Leucandra joubini
Ammotrypane breviata	Harmothoe spinosa	Pista cristata	Acanthophragma polaris	Celleporella hyalina	Lageneschara lyrulata	Smittina antarctica	Hypoaspis evansi	Cyllopus lucasii		Aplidium stewartense	Amblyraja georgiana	Sertularella articulata	Halicreas minimum	Bathycalanus richardi	Nymphon andriashevi	Paramoera pfefferi	Oithona frigida	Ambasiopsis georgiensis	Amphiura belgicae	Ophioleuce regulare	Austrocidaris spinulosa		Pseudokellya inexpectata	Diaphana pfefferi	Skenella georgiana	Cephalobus incisocaudatus	Longilaimus brachyuris	Sphaerolaimus asetosus	Macvicaria pennelli	Guitarra fimbriata	Leucetta leptoraphis
Ammotrypane gymnopyge	Hauchiella tribullata	Platynereis magalhaensis	Adelascopora jeqolqa	Chaperiopsis acanthina	Larvapora mawsoni*	Smittinella rubrilingulata	Isobactrus microdens	Cyllopus magellanicus	Chordata	Aplidium variabile	Bathyraja meridionalis	Sertularella cumberlandica	Haliscera conica	Bathycalanus typicus	Nymphon australe	Paramoera walkeri	Oithona similis	Glyptonotus antarcticus	Amphiura deficiens	Ophiolimna antarctica	Ctenocidaris geliberti	Echiura	Ptychocardia vanhoeffeni	Eatoniella aff. Caliginosa*	Skenella wareni*	Chromadora mucrodonta	Longilaimus filicaudatus	Sphaerolaimus duplex	Neolebouria antarctica	Halichondria prostrata	Leucosolenia falklandica
Ammotrypane scaphigera	Helicosiphon biscoensis	Polycirrus kerguelensis	Adelascopora secunda	Chaperiopsis protecta	Lichenopora canaliculata	Smittoidea albula	Lohmannella bihamata	Cyphocaris richardi		Ascidia challengeri		Sertularella polyzonias	Haliscera racovitzae	Bathylasma corolliforme	Nymphon bouvieri	Parandania boecki	Oncaea antarctica	Gnathiphimedia barnardi	Amphiura joubini	Ophiomages cristatus	Ctenocidaris perrieri	Echiurus antarcticus	Subcuspidaria kerguelensis	Eatoniella cana	Spongiobranchaea australis	Chromadora nudicapitata	Longitubopharynx obtusicaudatus	Sphaerolaimus gracilis	Postmonorchis variabilis	Haliclona bilamellata
Ampharete kerguelensis	Hermadion ferox	Polyeunoa laevis	Aimulosia antarctica	Chaperiopsis quadrispinosa	Macropora georgensis	Smittoidea conspicua	Lohmannella grandipora	Dactylamblyops hodgsoni	Fish	Ascidia meridionalis	Larvaceans	Sporadopora dichotoma	Pantachogon haeckeli	Calanoides acutus	Nymphon brevicaudatum	Parandania gigantea	Paraeuchaeta abbreviata	Gnathiphimedia macrops	Amphiura lymani	Ophionotus hexactis	Ctenocidaris speciosa		Thracia meridionalis	Eatoniella contusa*	Submargarita impervia	Chromadora pellucida	Mesacanthion virilis	Sphaerolaimus hirsutus		Haliclona glacialis	Sipuncula
Amphicteis gunneri	Hermadion magalhaensi	Potamilla antarctica	Aimulosia australis	Chaperiopsis rotundata	Menipea patagonica	Smittoidea malleata	Magellozetes antarcticus	Diastylis anderssoni	Aethotaxis mitopteryx	Ascidia translucida	Fritillaria borealis	Sporadopora granulosa	Pegantha martagon	Calanus propinquus	Nymphon charcoti	Paraperioculodes brevimanus	Paraeuchaeta antarctica	Gnathiphimedia mandibularis	Amphiura microplax	Ophionotus victoriae	Miracidaris incerta	Entoprocta	Thyasira falklandica	Eatoniella glacialis	Submargarita notalis	Cyatholaimus gracilis	Metalinhomoeus leptosoma	Spirinia parasitifera	Turbellaria	Haliclona nodosa
Amphitrite kerguelensis	Isocirrus yungi	Praxillella kergulensis	Alcyonidium epispiculum	Chaperiopsis acanthina	Micropora brevissima	Smittoidea ornatipectoralis	Nanorchestes macquariensis	Metopoides clavata	Antimora rostrata	Caenagnesia bocki	Oikopleura fusiformis	Staurotheca affinis	Solmundella bitentaculata	Calanus simillimus	Nymphon clarencei	Paraperioculodes brevirostris	Paraeuchaeta pseudotonsa	Gnathiphimedia sexdentata	Amphiura monorima	Ophioperla koehleri	Rhynchocidaris triplopora		Waldo parasiticus	Eatoniella kerguelenensis	Submargarita unifilosa	Daptonema acanthospiculum	Metalinhomoeus trichosoma	Theristus conicaudatus	Austrorhynchus magnificus	Haliclona penicillata	Golfingia anderssoni
Anaitides patagonica	Kinbergonuphis dorsalis	Protocirrineris antarctica	Amastigia gaussi	Cornucopina ovalis	Micropora notialis	Smittoidea rhynchota	Parasitiphis aurora	Metopoides elliptica	Artedidraco mirus	Cnemidocarpa digonas	Oikopleura gaussica	Staurotheca amphorophora	Abietinella operculata	Candacia maxima	Nymphon gracillimum	Paraserolis polita	Paraeuchaeta scotti	Gondogeneia georgiana	Amphiura proposita	Ophioplinthus martensi	Sterechinus agassizi	Loxosomella brachystipes	Waldo trapezialis	Eatoniella subgoniostoma	Tectonatica impervia	Daptonema normandicum	Micoletzkyia austrogeorgiae	Theristus filicaudatus	Austrorhynchus parapectatus	Hemigellius fimbriatus	Golfingia margaritacea
Anobothrus patagonicus	Kinbergonuphis notialis	Protolaeospira cavata	Amphiblestrum familiaris	Cornucopina pectogemma	Micropora brevissima	Smittoidea rhynchota	Parasitiphis brunneus	Metopoides magellanica	Bathydraco antarcticus	Cnemidocarpa pfefferi		Staurotheca dichotoma	Allopora robusta	Clausocalanus brevipes	Nymphon hiemale	Paratanais oculatus	Pleuromamma robusta	Gondogeneia subantarctica	Amphiura protecta	Ophioplinthus partita	Sterechinus antarcticus	Loxosomella varians	Yoldia eightsi	Eumetula dilecta	Toledonia punctata	Deontostoma antarcticum	Micoletzkyia nudicapitata	Theristus horridus	Austrorhynchus pectatus	Homaxinella balfourensis	Golfingia muricaudata
Aricia marginata	Laetmonice producta	Protolaeospira pedalis	Amphiblestrum geogensis	Cornucopina polymorpha	Micropora notialis	Spigaleos horneroides	Parasitiphis jeanneli	Metopoides sarsi	Bathydraco joannae*	Cnemidocarpa verrucosa	Thaliaceans	Staurotheca frigida	Antarctoscyphus asymmetricus	Clausocalanus laticeps	Diastylis helleri	Parepimeria bidentata	Pseudochirella batillipa	Halice profundi	Anasterias antarctica	Ophioplinthus tuberosa	Sterechinus neumayeri	Loxosomella compressa	Yoldia woodwardi	Iothia coppingeri	Torellia mirabilis	Deontostoma aucklandiae	Monhystera disjuncta	Theristus notoistospiculoides	Centrovarioplana tennis	Hymedesmia leptochela	Nephasoma diaphanes
Aricidea belgicae	Lagisca oculata	Protolaeospira triflabellis	Amphiblestrum henryi	Crassimarginatella inconstantia	Microporella hyadesi	Stomhypselosaria watersi	Porozetes polygonalis	Metopoides typicaminus	Careproctus georgianus	Corella eumyota	Salpa fusiformis	Staurotheca glomulosa	Antarctoscyphus elongatus	Conchoderma auritum	Diastylopsis annulata	Parepimeria crenulata	Pseudochirella elongata	Haplocheira plumosa	Anasterias studeri	Ophioplocus incipiens	Tripylaster philippii	Aglaophamus virginis	Thyasira falklandica	Kaitoa scaphandroides*	Tritonia antarctica	Desmodora aucklandiae	Monoposthia costata	Theristus notosetosus	Cylindrostoma bitubata	Hymedesmia similima	Phascolion lutense
Artacama proboscidea	Lanicides vayssierei	Pygospiopsis dubia	Amphiblestrum rossi	Crassimarginatella perlucida	Microporella stenoporta	Swanomia belgica	Rhagidia gerlachei	Mirandotanais vorax	Chaenocephalus aceratus	Culeolus murrayi	Salpa thompsoni	Staurotheca multifurcata	Calycopsis borchgrevinki	Coronula reginae	Didymochelia spongicola	Parhalimedon turqueti	Pseudochirella hirsuta	Heterophoxus videns	Anseropoda antarctica	Ophioscolex nutrix	Tripylus excavatus	Loxosomella brachystipes	Tindaria antarctica*	Kerguelenatica bioperculata	Tritonia vorax	Desmodora campbelli	Neochromadora craspedota	Theristus paroistospiculoides	Enterostomula uterina	Hymeniacidon fernandezi	Phascolion strombi
Asychis amphiglypta	Laonice antarcticae	Rhamphobrachium ehlersi	Amphiblestrum geogensis	Dakariella concinna	Microporella hyadesi	Swanomia brevimandibulata	Rhombognathus auster	Monoculodes scabriculosus	Champsocephalus esox	Cystodytes antarcticus		Staurotheca pachyclada	Campanularia subrufa	Ctenocalanus vanus	Djerboa furcipes	Parharpinia obliqua	Pseudochirella mawsoni	Hippomedon kergueleni	Anteliaster australis	Ophiura flagellata			Waldo parasiticus	Kerguelenella lateralis	Tritoniella belli	Desmodora elegans	Neochromadora notocraspedota	Theristus pellucidus	Falkla bacillata	Hyrtios arenosus
Austrolaenilla antarctica	Laubierpholoe antipoda	Rhodine intermedia	Antarcticaetos bubeccata	Dakariella dabrowni	Nematoflustra flagellata	Swanomia membranacea	Rhombognathus multisetosus	Mysidetes brachylepis	Champsocephalus gunnari	Dicarpa insinuosa	Cnidaria	Staurotheca undosiparietina	Cheiloporidion pulvinatum	Drepanopus forcipatus	Dodecas elongata	Parharpinia rotundifrons	Pseudochirella polyspina	Hippomedon major	Astrochlamys bruneus	Ophiura flexibilis	Holothuroids	Hemichordata	Waldo trapezialis	Laevilitorina caliginosa	Trophon albolabratus	Desmodora leptura	Neochromadora poecilosoma	Theristus simplex	Koinocystella inermis	Iophon aceratum	Tardigrades
Austrolaenilla hastulifera	Leaena abranchiata	Rhynchonerella bongraini	Apiophragma hyalina	Dendroperistomata projecta	Notoplites antarcticus	Talivittaticella frigida	Rhombognathus trouessart	Mysidetes dimorpha	Chionodraco rastrospinosus	Dicarpa mysogyna		Staurotheca vervoorti	Conopora pauciseptata	Drepanopus pectinatus	Dodecasella elegans	Paroediceroides sinuatus	Pseudochirella pustulifera	Holostylis helleri	Astrotoma agassizii	Ophiura irrorata	Amperima naresi		Yoldia eightsi	Laevilitorina caliginosa	Trophon brevispira	Desmodora longicaudata	Notosabatieria leptosoma	Thoracostoma antarcticum	Laidlawia trigonopora	Iophon proximum
Austrolaenilla pelagica	Leaena antarctica	Rhynchospio glutaea	Arachnopusia aviculifer	Ellisina antarctica	Notoplites crassicutus	Thrypticocirrus phylactelloides	Spinibdella antarctica	Mysidetes kerguelensis	Dissostichus eleginoides	Dicarpa tricostata	Anthozoans	Stylaster densicaulis	Cosmetirella davisi	Eucalanus longiceps	Dodecasella georgiana	Parschisturella carinata	Racovitzanus antarcticus	Holostylis spinicauda	Bathybiaster loripes	Ophiura meridionalis	Amperima robusta	Cephalodiscus hodgsoni*	Yoldia woodwardi	Laevilitorina pumilia	Trophon cribellum	Desmodora merostomacha	Notosouthernia obtusicauda	Thoracostoma aucklandiae	Leptoteredra maculata	Iophon radiatus	Macrobiotus asper
Austrophyllum charcoti	Leaena collaris	Sagitella kowalewskii	Arachnopusia aviculifera	Ellisina constantia	Notoplites drygalskii	Thrypticocirrus rogickae	Stereotydeus longipes	Mysidetes macrops	Electrona antarctica	Didemnum biglans	Acanthogorgia incrustans	Stylaster profundus	Crypthelia formosa	Euchaeta antarctica	Echiniphimedia echinata	Parschisturella simplex	Rhincalanus gigas	Hyperiella antarctica	Brisingenes multicostata	Ophiura mimaria	Amperima velacula	Cephalodiscus kempi*		Laevilitorina pygmaea	Trophon distantelamellatus*	Desmodora microchaeta	Odontophora longisetosa	Thoracostoma setosum	Meixnerides armatus	Isodictya antarctica	Macrobiotus furciger
Autolytus charcoti	Leanira quatrefagesi	Scalibregma inflatum	Arachnopusia decepiens	Escharella mamillata	Notoplites elongatus	Toretocheilnon absidatum		Mysidetes microps	Electrona carlsbergi	Didemnum psammatodes	Actinothoe georgiana	Symplectoscyphus glacialis	Diphyes antarctica	Euchaeta biloba	Echiniphimedia hodgsoni	Phoxorgia sinuata	Scolecithricella minor	Hyperiella dilatata	Cheiraster hirsutus	Ophiura rouchi	Anapta fallax		Cephalopods	Laevilitorina umbilicata	Trophon minutus*	Desmodora notomicrochaeta	Oncholaimus dujardinii	Thoracostoma vallini	Mesoda Marcus	Isodictya cactoides	Testechiniscus macronyx
Autolytus gibber	Leiochone singularis	Scoloplos marginatus	Arachnopusia inchoata	Escharella watersi	Notoplites klugei	Toretocheilnon turbinatum	Pycnogonids	Mysidetes posthon	Gobionotothen angustifrons	Didemnum studeri	Artemidactis victrix	Symplectoscyphus subdichotomus	Errina boschmai	Euchaeta dactylifera	Echiniphimedia scotti	Podocerus cristatus	Nymphon neelovi	Hyperoche medusarum	Chitonaster johannae	Ophiuroglypha carinifera	Bathyplotes profundis	Mollusca	Adelieledone polymorpha	Limacina helicina	Trophon scotianus	Desmodora paracampbelli	Oncholaimus longissimus	Trefusia axonolaimoides	Orthoplana bregazzii	Isodictya kerguelenensis
Autolytus simplex	Leodora perrieri	Serpula narconensis	Arachnopusia monoceros	Escharella watersi	Notoplites tenuis	Toretocheilum absidatum	Achelia communis	Mysidopsis acuta	Gobionotothen gibberifrons	Distaplia colligans	Actinernus elongatus	Zanclonia weldoni	Errina fasicularis	Euchaeta eltaninae	Eclysis similis	Podocerus septemcarinatus	Nymphon paucidens	Iphimediella margueritei	Cladaster analogus	Ophiuroglypha lymani	Benthodytes incerta		Batoteuthis skolops	Limacina inflata	Trophon shackeltoni	Desmodora paramicrochaeta	Oncholaimus notolangrunensis	Ungulilaimus filicaudatus	Placorhynchus meridionalis	Isodictya setifera
Brada villosa	Levidorum scotiarum	Serpula vermicularis	Aspericreta crassatina	Escharoides praestita	Ogivalia elegans	Trilaminopora trinervis	Achelia hoekii	Mysis australe	Gobionotothen marionensis	Distaplia cylindrica	Actinoscyphia plebeia	Tetraplatia chuni	Errina gracilis	Euchaeta farrani	Ekelofia oculata	Polycheria acanthopoda	Nymphon pfefferi	Ischyrocerus camptonyx	Crossaster fuscus	Ophiurolepis brevirama	Benthodytes sanguinolenta	Bivalves	Galiteuthis glacialis	Limacina retroversa	Typhlodaphne purissima	Desmodora scaldensis	Oncholaimus paralangrunensis	Viscosia antarctica	Plicastoma lutheri	Isodictya toxophila
Bradabyssa papillata	Lumbriclymenella robusta	Sphaerodoridium parvum	Aspericreta favulosa	Escharoides torquata	Orthoporidra brachyrhyncha	Trilochites biformatus	Achelia spicata	Neolithodes diomedeae	Gymnoscopelus braueri	Eugyra kerguelenensis	Actinostola crassicornis	Dasystenella acanthina	Errina labiata	Euchaeta longissima	Epimeria georgiana	Polycheria antarctica	Pallenopsis buphtalmus	Jassa alonsoae	Cuenotaster involutus	Ophiurolepis gelida	Cladodactyla crocea	Adacnarca nitens	Gonatus antarcticus	Lorabela notophila	Venustatrochus georgianus*	Desmodora stateni	Oncholaimus viridis	Viscosia brevilaima	Porrocystis assimilis	Kirkpatrickia coulmani
Brania kerguelensis	Lumbrineris cingulata	Sphaerodoropsis parva	Aspericreta georgensis	Escharoides tridens	Orthoporidra compacta	Turritigera cribata	Ampelisca anversensis	Notocrangon antarcticus	Gymnoscopelus nicholsi	Eugyrioides polyducta	Antipodactis scotiae	Fannyella kuekenthali	Errina lowei	Euchaeta parvula	Epimeria intermedia	Polycheria dentata	Pallenopsis gurjanovi	Jassa falcata	Cycethra verrucosa	Ophiurolepis martensi	Cucumaria ferrari	Adamussium colbecki	Histioteuthis eltaninae	Lorabela pelseneeri		Desmodora tenuispiculum	Oxyonchus dentatus	Viscosia langrunensis	Procerodes wandeli	Kirkpatrickia variolosa
Capitella capitata	Lumbrineris kerguelensis	Spiophanes soderstromi	Aspidostoma coronatum	Escharoides praestita	Osthimosia bicornis		Ampelisca bouvieri	Nototanais dimorphus	Harpagifer bispinis	Molgula euplicata	Bathypathes alternata	Funiculina quadrangularis	Errinopsis fenestrata	Euchaeta rasa	Epimeria puncticulata	Polycheria gracilipes	Pallenopsis lattina	Jassa fenwicki	Diplasterias brandti	Paralophaster antarcticus	Cucumaria georgiana	Cuspidaria infelix	Kondakovia longimana	Margarella achilles*	Polyplacophorans	Desmolaimus bibulbosus	Oxyonchus parastateni	Viscosia pellucida	Siphoniella anderssoni	Lissodendoryx nobilis
Capitella perarmata	Lumbrineris magalhaensis	Stauronereis furcatus	Austroflustra vulgaris	Escharoides tridens	Osthimosia clavata	Cephalorhyncha	Ampelisca eschrichtii	Oediceroides calmani	Harpagifer georgianus	Molgula georgiana	Bathypathes bifida	Gersemia antarctica	Eudendrium antarcticum	Euchaeta regalis	Euchaetomera zurstrasseni	Primno macropa	Pallenopsis patagonica	Jassa ingens	Diplasterias brucei	Pentoplia felli	Cucumaria steineni	Cuspidaria tenella	Moroteuthis knipovitchi	Margarella steineni*	Hemiarthrum setulosum	Desmolaimus conicaudatus	Oxyonchus stateni	Viscosia similis	Solenopharynx flavidus	Lissodendoryx ramilobosa
Chaetozone andersenensis	Lysilla loveni	Steggoa hunteri	Beania erecta	Exochella hymanae	Osthimosia claviformis		Ampelisca richardsoni	Oediceroides lahillei	Krefftichthys anderssoni	Molgula hodgsoni	Bolocera kerguelensis	Mirostenella articulata	Eudendrium cyathiferum	Ammothea carolinensis	Eucopia australis	Probolisca elliptica	Pallenopsis spicata	Jassa multidentata	Diplasterias meridionalis	Perknaster aurantiacus	Ekkentropelma brychia	Cyamiomactra laminifera	Pareledone polymorpha	Margarella tropidophoroides*	Tonicina zschaui	Desmolaimus macrocirculus	Oxystomina elongata	Viscosia tenuilaima	Stummeria marginata	Microxina benedeni
Cirratulus antarcticus	Maldane sarsi	Sternaspis scutata	Beania scotti	Exochella hymanae	Osthimosia curtioscula	Priapulus caudatus	Andaniotes linearis	Oediceroides macrodactylus	Lampanyctus achirus	Molgula longivascula	Capnea georgiana	Mopsea elongata	Eudendrium rameum	Ammothea clausi	Eucopia grimaldii	Proboloides typica	Pallenopsis vanhoeffeni	Lepidepecreella ovalis	Diplasterias octoradiata	Perknaster charcoti	Ekmocucumis steineri	Cyamium cf. willi*	Pareledone turqueti	Margarita subantarctica		Desmoscolex parafalklandiae	Oxystomina mirabilis	Viscosia tenuissima	Stylochoides albus	Mycale acerata
Cirratulus cirratus	Melinna cristata	Syllides articulosus	Buffonellaria frigida	Fenestrulina cervicornis	Osthimosia milleporoides	Priapulus tuberculatospinosus	Antarctomysis maxima	Oediceroides newnesi	Lepidonotothen kempi	Molgula malvinensis	Carophyllia eltaninae	Onogorgia nodosa	Grammaria abietina	Ammothea glacialis	Eudorella fallax	Prostebbingia brevicornis	Pantopipetta longituberculata	Lepidepecreoides xenopus	Diplasterias radiata	Perknaster densus	Elpidia glacialis	Cyclocardia astartoides	Psychroteuthis glacialis	Nacella concinna		Dolicholaimus marioni	Oxystomina oxycaudatum	Viscosia viscosa	Stylostomum Ellipse	Mycale magellanica
